# Supplementary material
Source: Royal Society of Chemistry journal article supplement (doi:10.1039/d6ta01517d)
Supplement: d6ta01517d8.pdf [file d6ta01517d8.pdf]

1 **Supporting Information**

2

3 **Crosslinking-free preparation of thermoplastic triblock liquid crystal**  
4 **elastomer actuators**

5

6 Ting Liu,<sup>‡a</sup> Jiaxin Yang,<sup>‡a</sup> Jie Jiang,<sup>b</sup> Lu Yin,<sup>b</sup> Hongwei Ma,<sup>a</sup> Yue Zhao,<sup>\*b</sup>  
7 Yang Li,<sup>a</sup> Li Han<sup>\*a</sup>

8

9 <sup>a</sup> State Key Laboratory of Fine Chemicals, Department of Polymer Science and  
10 Engineering, Liaoning key Laboratory of Polymer Science and Engineering, School of  
11 Chemical Engineering, Dalian University of Technology, Dalian 116024, China

12

13 <sup>b</sup> Département de Chimie, Université de Sherbrooke, Sherbrooke, Québec J1K 2R1,  
14 Canada

15

16 E-mail: hanli@dlut.edu.cn; yue.zhao@usherbrooke.ca

17

18 [‡]: These authors contributed equally to this work.

19

## 20 1. Experimental section

### 21 1.1 Materials

22 All reagents were used as received without further purification. Styrene-butadiene-  
23 styrene triblock copolymers (SBS) ( $M_w \sim 140000$ , 30 wt.% styrene) was purchased from  
24 Sigma-Aldrich. 2-Methyl-4'-(methylthio)-2-morpholinopropiophenone (I907) and 4-  
25 dimethylaminopyridine (DMAP) were acquired from TCI. Diisopropyl azodicarboxylate  
26 (DIAD), triphenylphosphine (TPP), and tin (II) chloride were purchased from Macklin.  
27 2-Mercaptoethanol, phenol, ethyl 6-bromohexanoate, N-(3-dimethylaminopropyl)-N'-  
28 ethylcarbodiimide hydrochloride (EDC) and 2-butanol were acquired from Energy  
29 Chemical. 4-Aminoanisole, and p-Nitrophenol were purchased from Aladdin. Other  
30 reagents, including N, N-dimethylformamide (DMF), methylbenzene, hydrochloric acid  
31 (37 wt.%), methanol (AR), ethanol (AR), sodium hydroxide (NaOH), sodium  
32 bicarbonate ( $\text{NaHCO}_3$ ), tetrahydrofuran (THF), potassium carbonate ( $\text{K}_2\text{CO}_3$ ),  
33 potassium iodide (KI), and potassium hydroxide (KOH) were obtained from Tianjin Bodi  
34 Chemical Co., Ltd.

35

### 36 1.2 Synthesis of AZO monomers

37  $M_m$  and  $M_b$  were synthesized by the general methods,<sup>[36]</sup> as shown in Scheme S1.  
38 Their structures were characterized by  $^1\text{H-NMR}$  and FT-IR spectra, and their  
39 characteristic temperatures and liquid crystal properties were analyzed by DSC curves  
40 and POM images (Figure S2 and S3).

41

### 42 1.3 Synthesis of hydroxy-functionalized SBS (SBS-OH)

43 SBS-OH was synthesized by thiol-ene "click" reaction, as shown in Scheme S2.  
44 Typically, SBS (2 g,  $\text{Bd} = 0.026$  mol) was dissolved in anhydrous toluene (50 mL) in a  
45 round bottomed flask, after which 2-mercaptoethanol (10.9 mL, 0.15 mol) and a trace  
46 quantity of the photo initiator I907 (0.06 mg, 0.00021 mmol) were injected into the flask  
47 in a nitrogen atmosphere. The solution was stirred and irradiated with the 320-500 nm  
48 light for 12 h at room temperature. The resulting polymer was precipitated in a large  
49 volume of cold methanol, filtered, and dried under vacuum at room temperature. Its  
50 structure and characteristic temperature were measured by  $^1\text{H-NMR}$  and DSC analysis  
51 (Figure S4).

52

### 53 1.4 Synthesis of liquid crystal elastomers (SBS-AZO90-N)

54 The synthetic routes of SBS-AZO90-N are shown in Scheme S2. The synthesis  
55 procedures for SBS-AZO90-1 are described in detail below as an example. SBS-  
56 AZO90-1 was prepared using a 9:10 molar ratio of AZO monomers and the hydroxyl  
57 group in SBS-OH, where the molar ratio of  $M_b$  to  $M_m$  is 1:5. SBS-OH (0.4 g, -OH=2.56  
58 mmol) was completely dissolved in DMF (20 mL) at 60 °C. Then, prescribed quantities  
59 of AZO monomers  $M_b$  (0.148g, 0.42 mmol) and  $M_m$  (0.657g, 2.10 mmol), EDC (0.984  
60 g, 6.34 mmol) and DMAP (0.244 g, 2.00 mmol) were added to the solution, and the  
61 mixture was refluxed at 60 °C for 12 h. The reactant solution was cooled to room  
62 temperature, precipitated into 300mL methanol solution twice, and the resulting  
63 precipitate was dried to a constant weight. The synthetic process was monitored by  
64  $^1\text{H-NMR}$  spectra (Fig. S3). According to the NMR integration results, the total grafting  
65 ratio of the AZO monomer was 70%, with 14% of  $M_b$  and 56% of  $M_m$  grafting. The  
66 control sample SBS-AZO90-0 was prepared using a 9:10 molar ratio of  $M_m$  and the  
67 hydroxyl group in SBS-OH, and the synthesis method as above.

68

#### 69 1.5 Preparation of the AZO-LCE films

70 SBS-AZO90-N samples have excellent solubility and recyclability. Typically, SBS-  
71 AZO90-N (0.09 g) was completely dissolved in chloroform (1.8 ml), and the polymer  
72 solution was cast onto a PTFE mold. The films were dried in air for 1 day and kept  
73 under vacuum for another 1 day at r. t. to completely remove residual solvent. The  
74 thickness of AZO-LCEs films was 60  $\mu\text{m}$ .

75

#### 76 1.6 Preparation of SBS-based LCE actuators

77 SBS-based LCE actuators were prepared by uniaxial stretching above  $T_g^{\text{PS}}$ . SBS-  
78 AZO90-N film (with a length of 20 mm and a width of 10 mm before stretching) was  
79 stretched at 120 °C to an elongation of 100~300%. Subsequently, the uniaxially  
80 stretched film was slowly cooled to r. t. to gradually generate PS aggregation domains  
81 as physical architecture to lock in the orientation, after which the external force was  
82 removed.

83

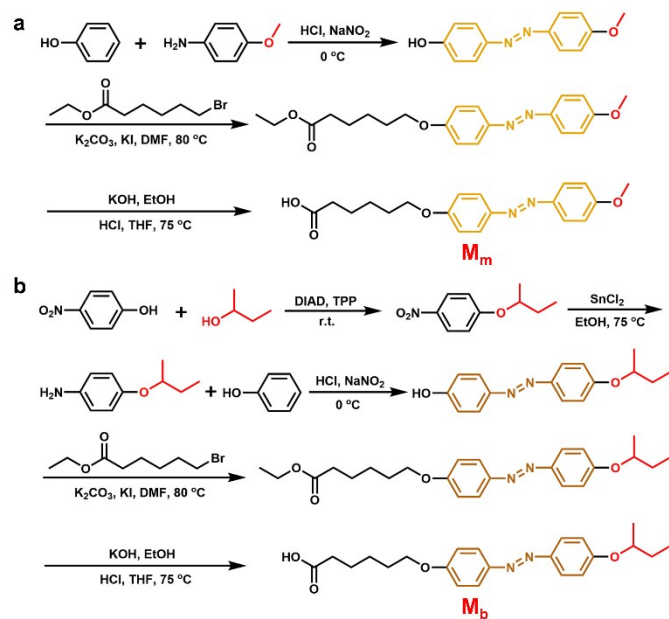

84

85 **Scheme S1.** Synthesis routes of AZO mesogen monomers: a)  $M_m$ , b)  $M_b$ .

86

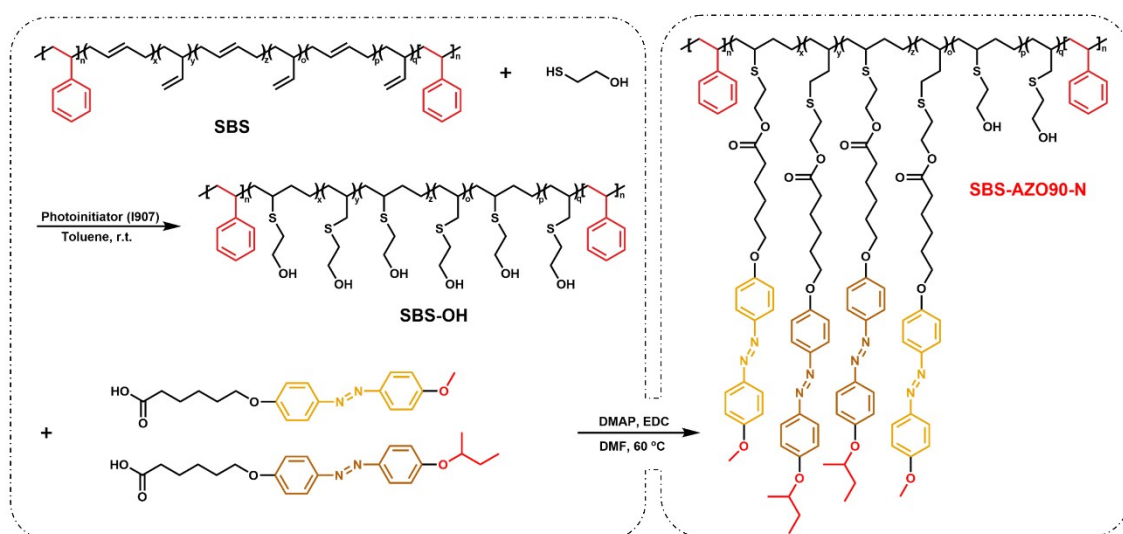

87

88 **Scheme S2.** Synthesis routes of SBS-based AZO-LCEs (SBS-AZO90-N).

89

90

## 91 **2. General Characterization**

92 Proton nuclear magnetic resonance spectra ( $^1\text{H-NMR}$ ) were obtained using a  
93 Bruker Avance II 400 MHz spectrometer (Bruker Co., Ltd., Karlsruhe, Germany) to  
94 determine the molecular structures of all the synthesized monomers and polymers.  
95 Fourier transform infrared spectroscopy (FT-IR) was carried out using a Bruker  
96 Equinox55 (Bruker Co., Ltd., Karlsruhe, Germany) with an infrared polarizer, and  
97 transmission FT-IR spectra were recorded at a rate of  $5\text{ }^\circ\text{C min}^{-1}$  between  $30\text{ }^\circ\text{C}$  and  
98  $120\text{ }^\circ\text{C}$  to characterize the dynamics of hydrogen bonding and orientation of AZO  
99 mesogens in the AZO-LCEs during a temperature change. The thermal transition  
100 temperatures of all the samples were measured by differential scanning calorimetry  
101 (DSC TAQ2000) using approximately 8 mg of a sample under a nitrogen atmosphere  
102 (nitrogen flow rate =  $50\text{ mL min}^{-1}$ ) and a heating and cooling rate of  $10\text{ }^\circ\text{C min}^{-1}$ . The  
103 shape memory properties were quantitatively characterized by DMA (TAQ800) under  
104 controlled force mode. Ultraviolet-visible spectrophotometer (UV-Vis): UV-2600  
105 (SHIMADZU, Kyoto Japan), used to measure the radiation absorption of AZO  
106 monomers in the ultraviolet and visible spectral regions and to analyze the optical  
107 response properties of substances. 1D/2D-WAXD were performed using a Bruker D8  
108 Advance X-ray diffractometer with a CuK $\alpha$  radiation source (wherein wavelength  
109  $\lambda=1.54\text{ \AA}$ ). An optical microscope (Leica DMLP) equipped with a hot stage was used  
110 to observe the liquid crystalline textures. The strips were tested by an Instron 5567A  
111 machine for the stress-strain experiments at a rate of  $10\text{ mm/min}$  at room temperature.  
112 The photoreaction was carried out using an OmniCure@Series 1000 UV-vis lamp with  
113 365/400-500 nm filters.

114

115 **3. Supplementary Figures and Discussion**

116

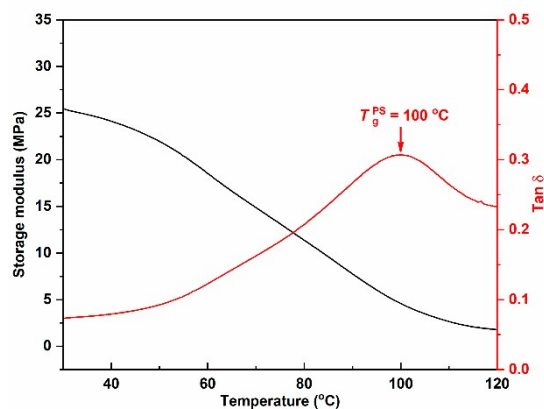

117

118 **Figure S1.** Storage modulus and loss factor curves of the starting material SBS

119

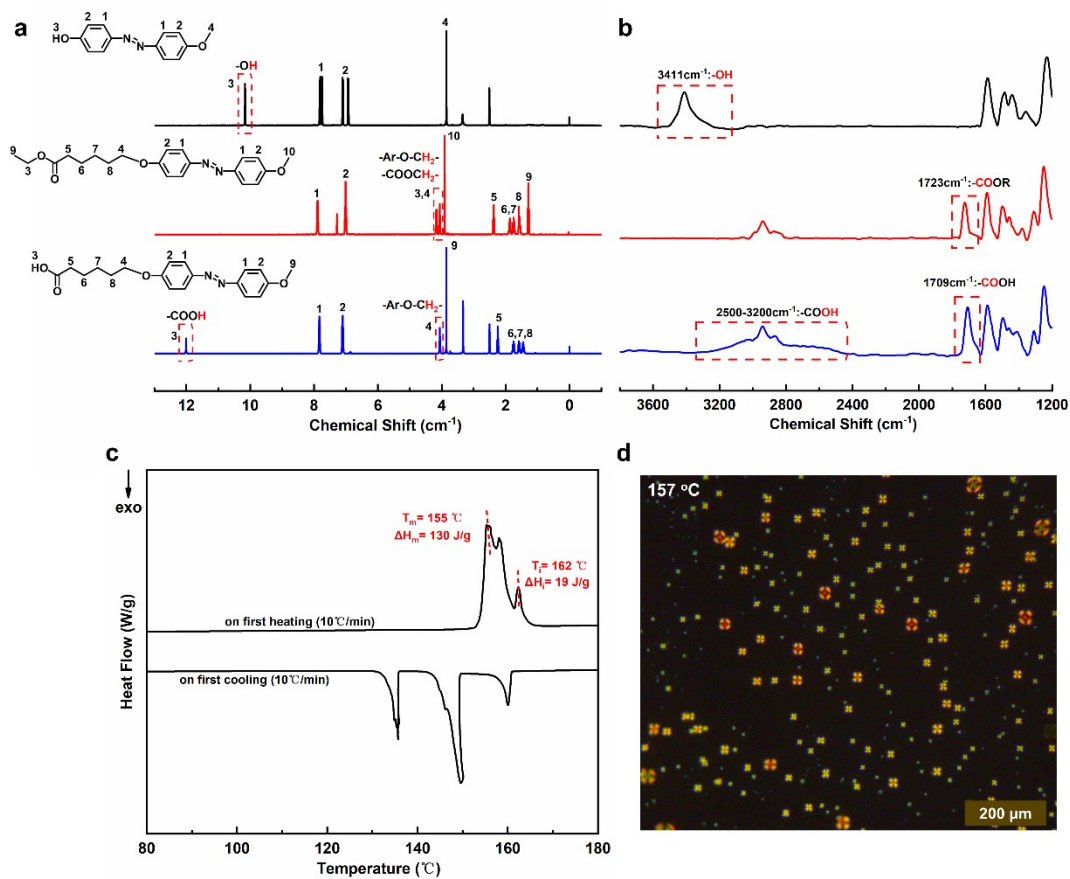

120

121 **Figure S2.** a) <sup>1</sup>H NMR spectra of M<sub>m</sub> and intermediates. b) FT-IR spectra of M<sub>m</sub> and intermediates. c)

122 DSC curves of M<sub>m</sub>. d) POM (200 μm) image of M<sub>m</sub> in LC phase.

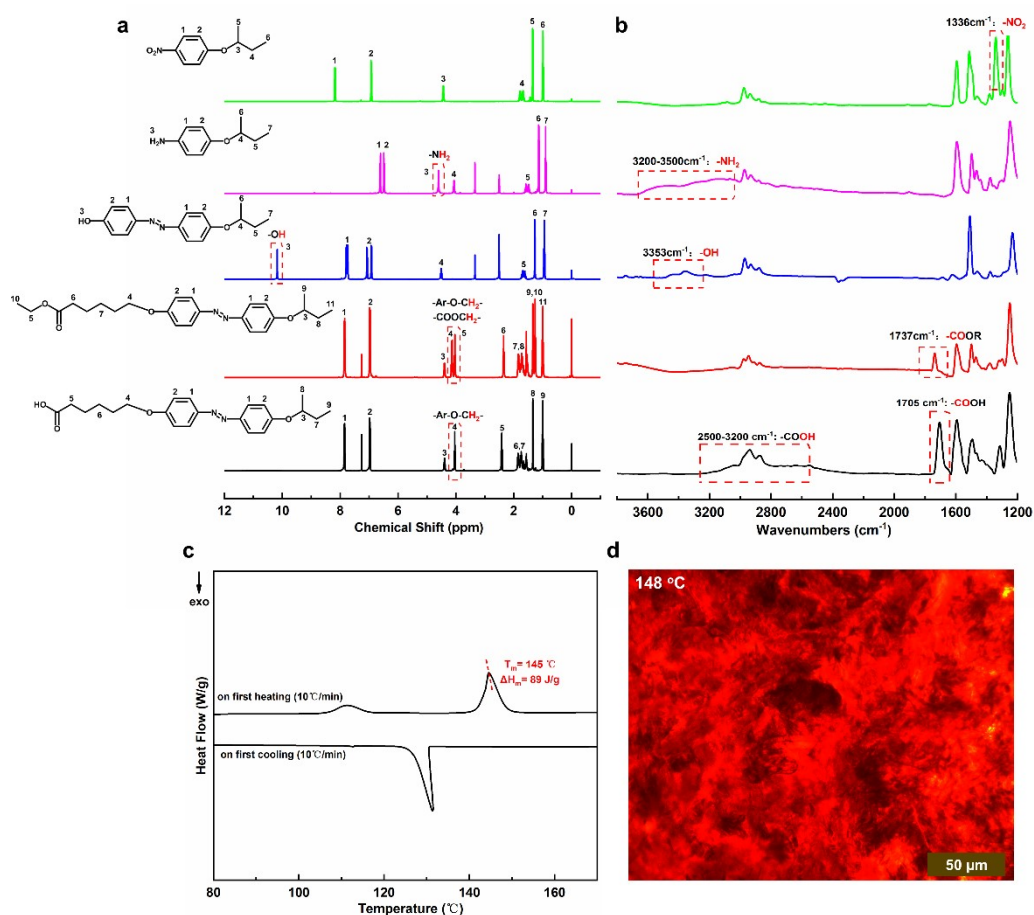

123

124 **Figure S3.** a) <sup>1</sup>H NMR spectra of M<sub>b</sub> and intermediates. b) FT-IR spectra of M<sub>b</sub> and intermediates. c)

125 DSC curves of M<sub>b</sub>. d) POM (50 μm) image of M<sub>b</sub> at 148 °C.

126

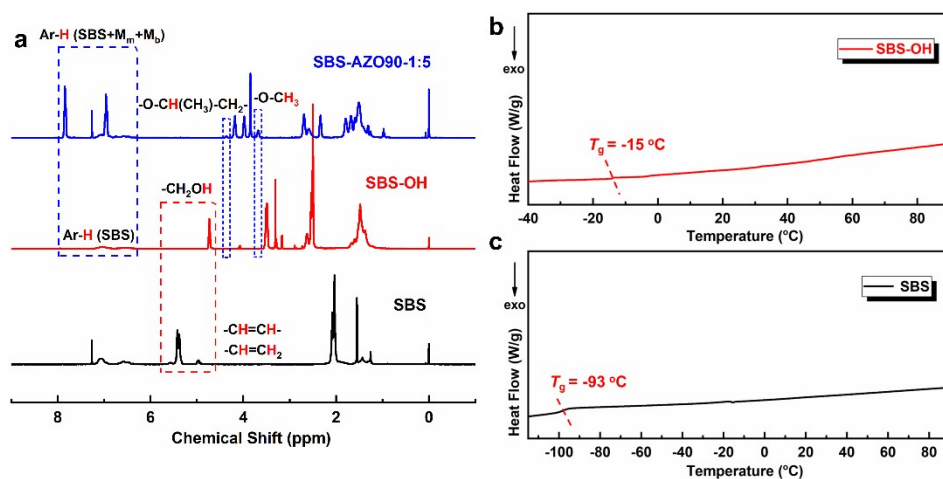

127

128 **Figure S4.** a) <sup>1</sup>H-NMR spectra of SBS-AZO90-1:5 and intermediates. b) DSC curves of SBS-OH and c)

129 SBS.

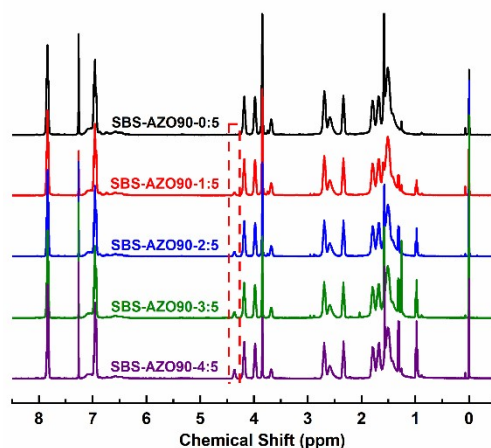

130

131 **Figure S5.**  $^1\text{H-NMR}$  spectra of thermoplastic LCEs SBS-AZO90-N (0~4:5).

132

133 **Table S1.** The calculated grafting degrees based on  $^1\text{H-NMR}$  spectra

| Sample        | Total grafting degrees | The grafting degrees of $M_b$ | The grafting degrees of $M_m$ |
|---------------|------------------------|-------------------------------|-------------------------------|
| SBS-AZO90-0:5 | 76%                    | 0%                            | 76%                           |
| SBS-AZO90-1:5 | 70%                    | 17%                           | 56%                           |
| SBS-AZO90-2:5 | 71%                    | 29%                           | 49%                           |
| SBS-AZO90-3:5 | 73%                    | 38%                           | 45%                           |
| SBS-AZO90-4:5 | 73%                    | 45%                           | 38%                           |

134

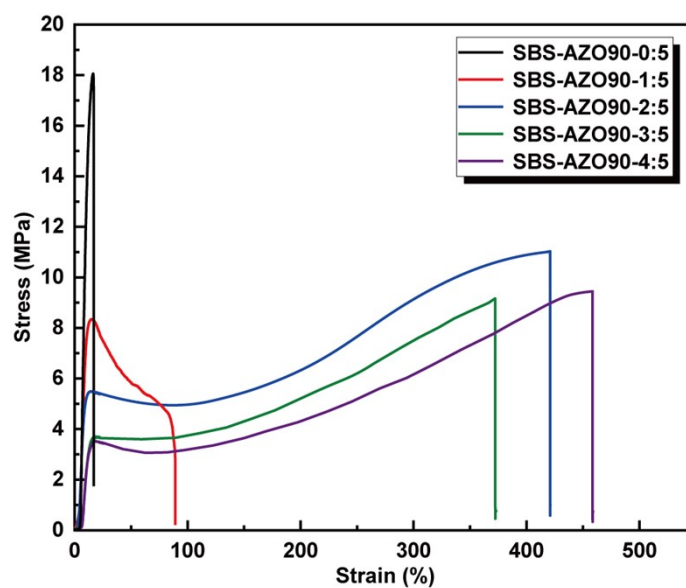

135

136 **Figure S6.** Tensile properties curves of SBS-AZO90 series films.

137

138 **Table S2.** Tensile properties data of SBS-AZO90 series films

| Sample        | Young's modulus (MPa) | Tensile strength at break (MPa) | Elongation at break (%) |
|---------------|-----------------------|---------------------------------|-------------------------|
| SBS-AZO90-0:5 | 296.4                 | 18.00                           | 6.35                    |
| SBS-AZO90-1:5 | 132.8                 | 8.46                            | 89                      |
| SBS-AZO90-2:5 | 111.7                 | 11.03                           | 420                     |
| SBS-AZO90-3:5 | 63.7                  | 9.17                            | 372                     |
| SBS-AZO90-4:5 | 59.0                  | 9.43                            | 485                     |

139

140

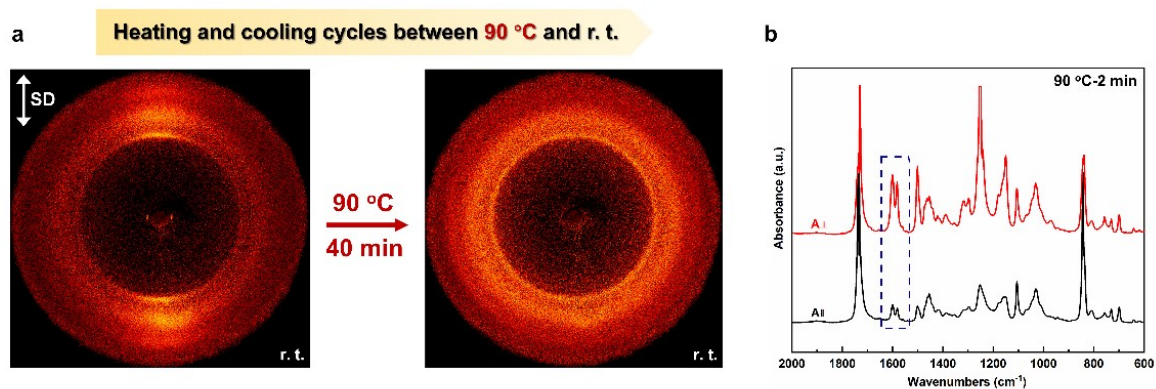

141

142 **Figure S7.** a) 2D-WAXD patterns of SBS-AZO90-0:5 during thermal relaxation at 90 °C for 40 min. b)

143 Polarized FT-IR spectra of SBS-AZO90-0:5 at 90 °C thermal relaxation for 2 min.

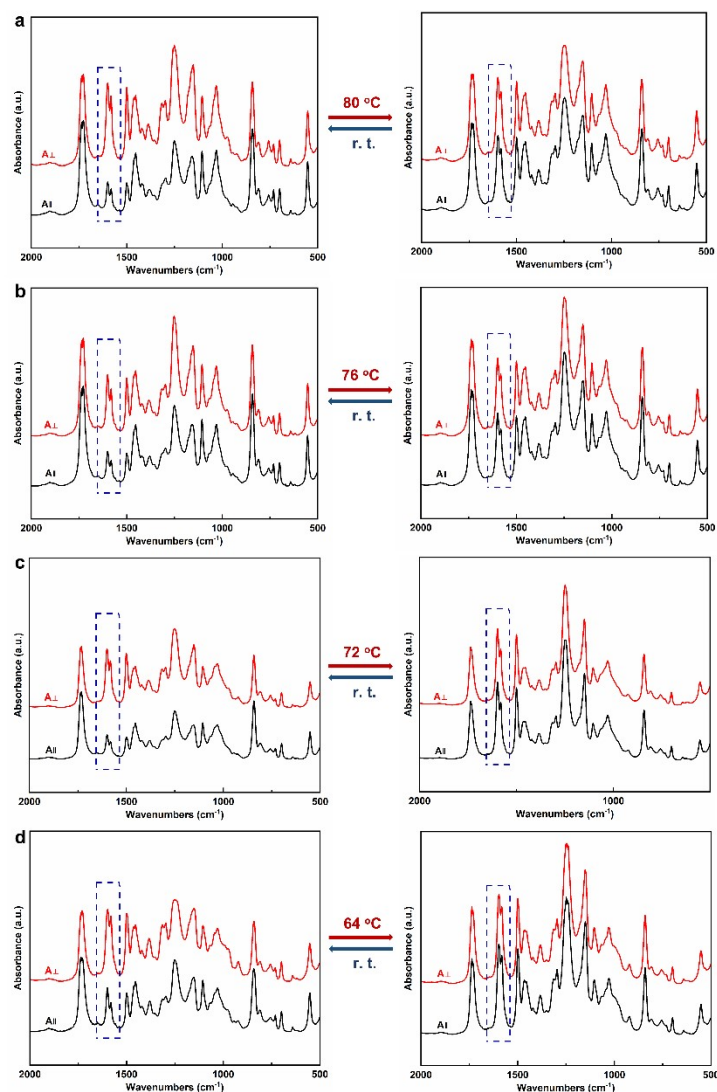

144

145 **Figure S8.** The *in situ* polarized FT-IR spectra for the infrared dichroism of a monodomain strip: a) SBS-  
 146 AZO90-1:5 recorded between 80 °C and r. t.; b) SBS-AZO90-2:5 recorded between 76 °C and r. t.; c)  
 147 SBS-AZO90-3:5 recorded between 72 °C and r. t.; d) SBS-AZO90-4:5 recorded between 64 °C and r.  
 148 t.

149

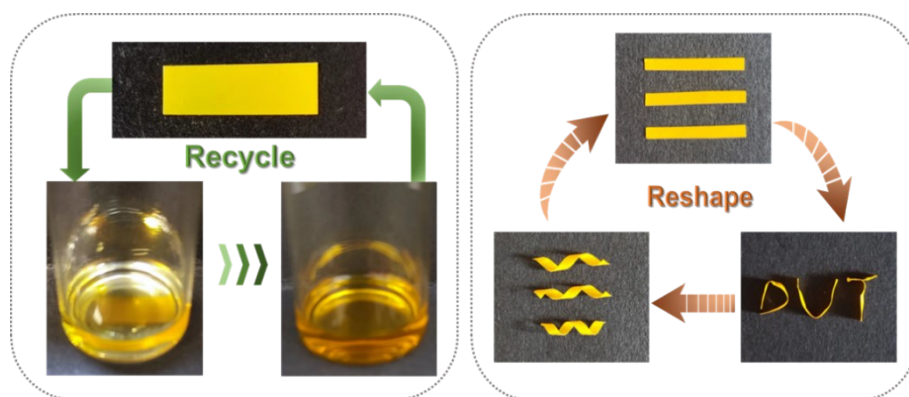

150

151 **Figure S9.** Photographs showing recycling behaviour and reshaping behaviour.

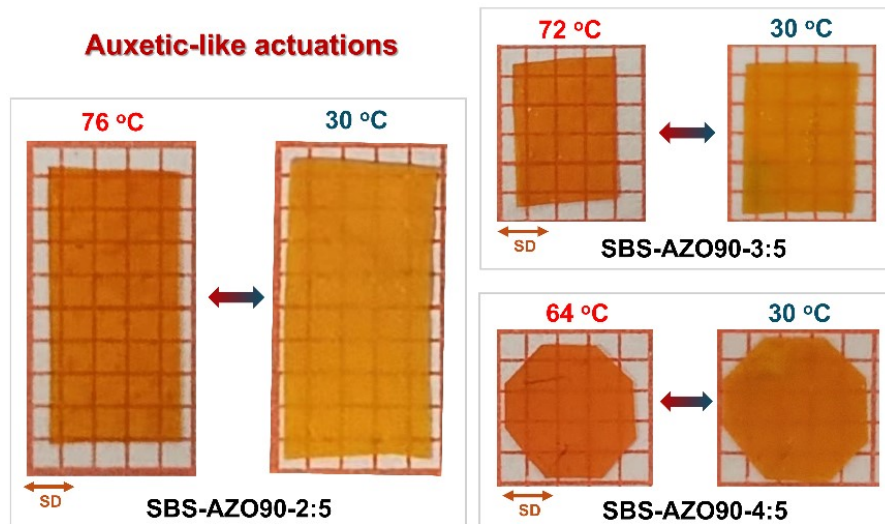

152

153 **Figure S10.** The auxetic-like actuations of the monodomain SBS-AZO90-2:5/3:5/4:5 strips.

154

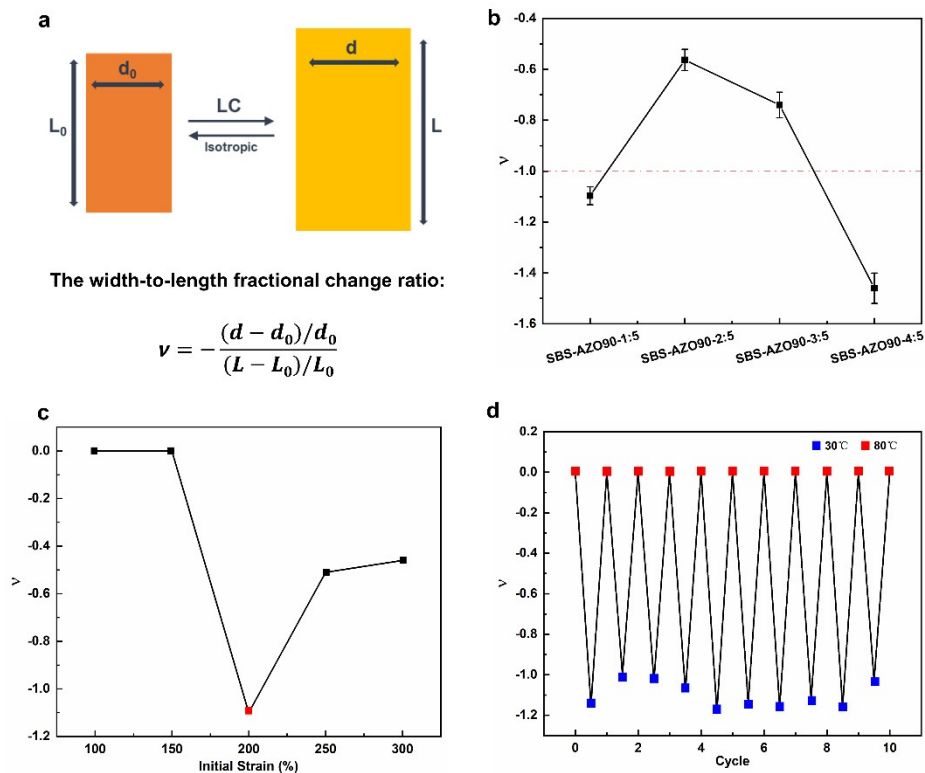

155

156 **Figure S11.** a) The definition of width-to-length fractional change ratio,  $v$ . b) Change in  $v$  as a function

157 of the different initial strains (100%~300%) used in preparing the oriented SBS-AZO90-1:5 strip. c)

158 Change in  $v$  as a function of the initial strain (200%) used in preparing the LCE strip actuator. d)

159 Reversible auxetic-like shape change cycles by thermally induced order-disorder phase transition.

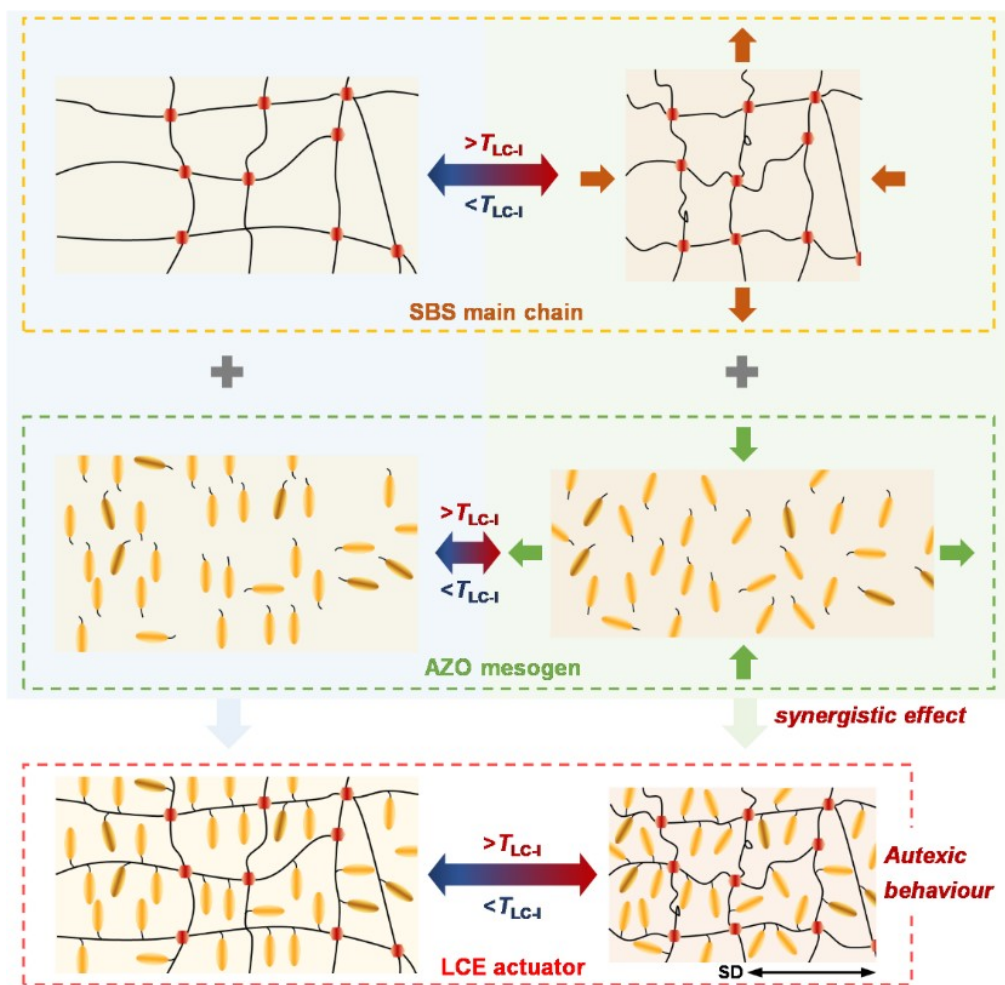

160

161

162

**Figure S12.** The mechanism of auxetic-like actuations for monodomain SBS-AZO90-N strips.

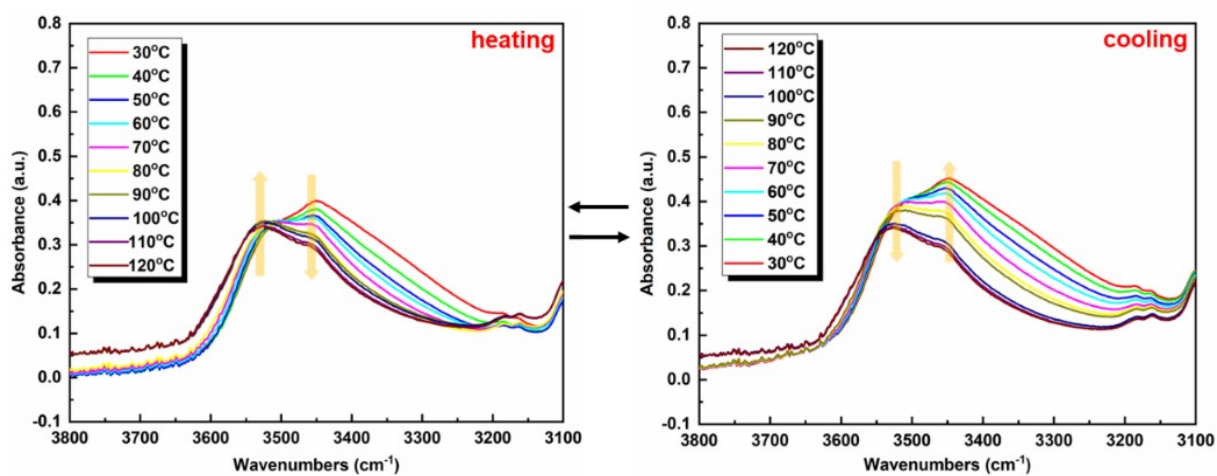

163

**Figure S13.** The temperature-dependent *in situ* FT-IR spectra (cyclic temperature change process

165 between 30-120 °C) of SBS-AZO90-1:5.

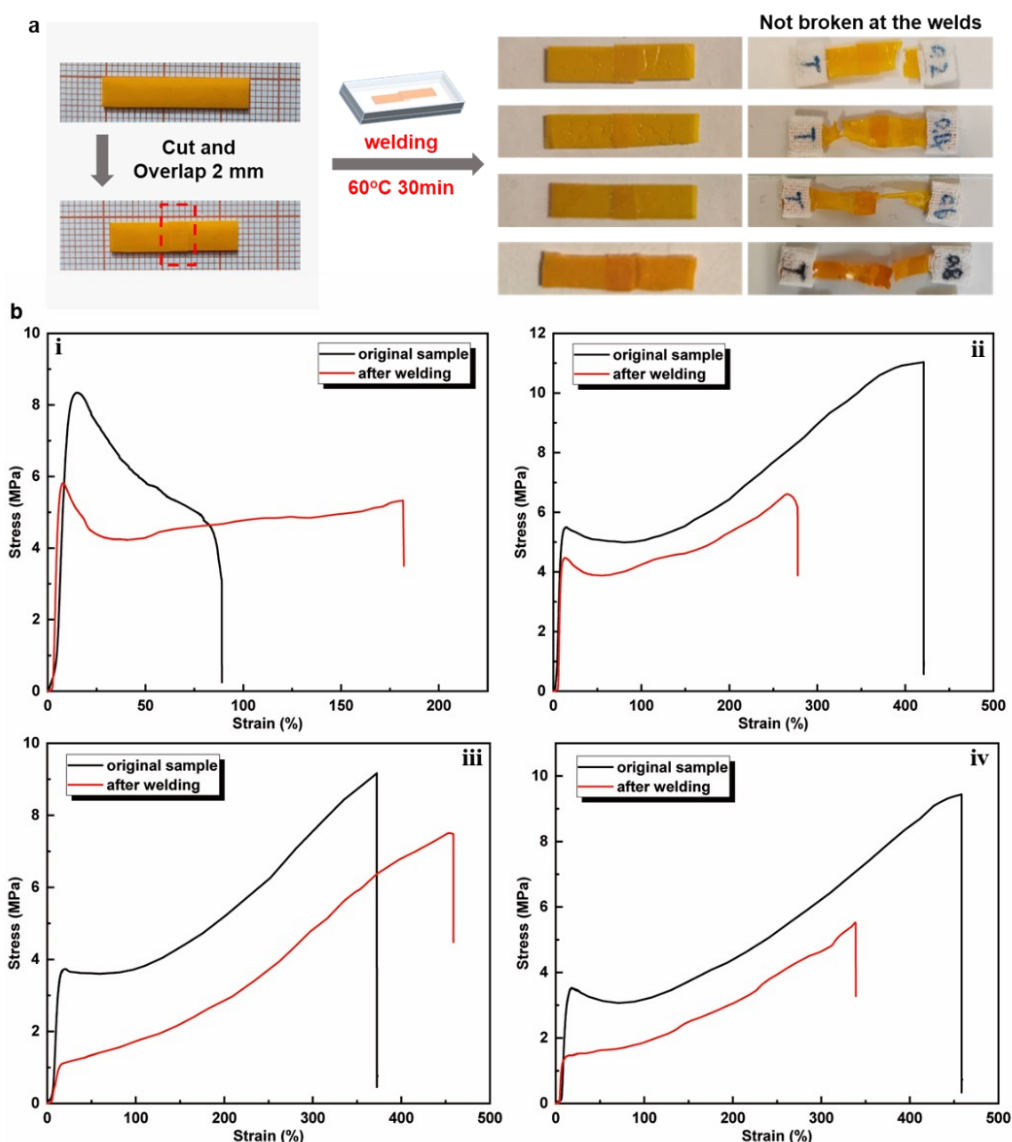

166

167 **Figure S14.** a) Photographs showing the welding process. The strips (25 mm×5 mm×60 μm) were first  
 168 cut into two pieces, of which the edges were immediately overlapped by 2 mm, sandwiched between  
 169 two glass slides without external force and heated at 60 °C for 30 min. Then the welding strips were  
 170 subjected to stress-strain experiments to obtain the mechanical properties, and they did not break from  
 171 the welds during the tensile tests. The breaking stresses were employed to evaluate the welding  
 172 efficiency. b) The stress-strain curves (10 mm min<sup>-1</sup>) of the original films and welded films for i) SBS-  
 173 AZO90-1:5; ii) SBS-AZO90-2:5; iii) SBS-AZO90-3:5; iv) SBS-AZO90-4:5.

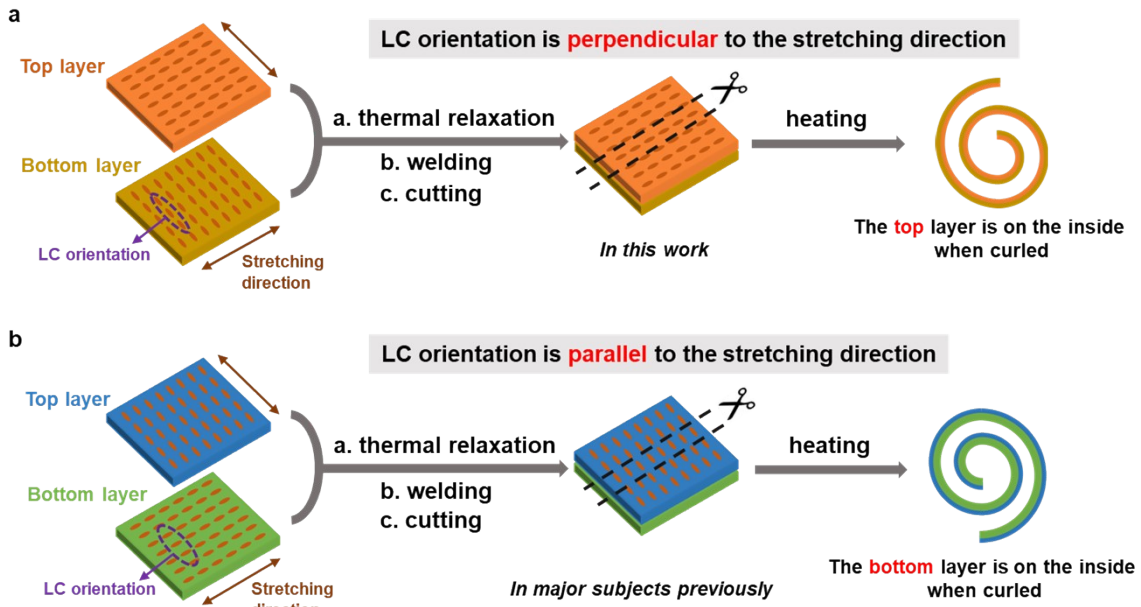

174

175 **Figure S15.** Photographs showing different curling phenomena for a) vertical and b) parallel systems.

176

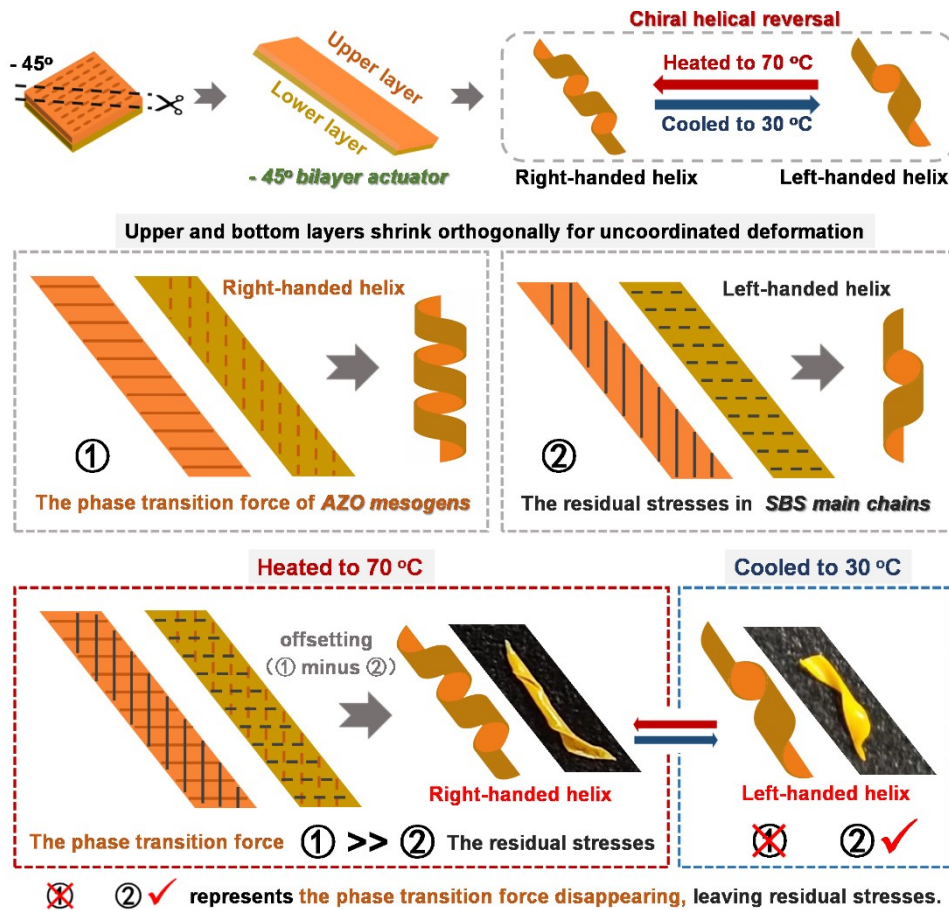

177

178 **Figure S16.** The mechanism for reversal behaviours of -45° bilayer actuator.

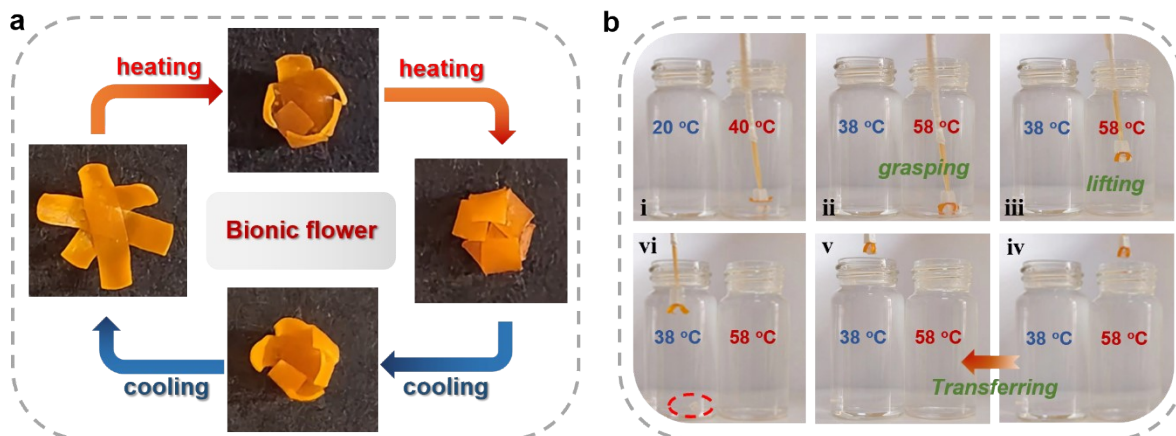

179

180 **Figure S17.** a) The blooming and closing process of bionic flower actuator. b) An underwater gripper  
 181 executing a series of robot-like motion tasks.

182 **4. Movie caption**

183 **Movie S1:** Auxetic-like actuation of SBS-AZO90-1:5 actuator.

184 **Movie S2:** The helical/coiled actuation behaviors of modular-assembled actuators.

185 **Movie S3:** The temporally sequenced asynchronous deformations of the right hand.

186 **Movie S4:** The ambidirectional actuation behaviors of modular-assembled actuators.

187 **Movie S5:** Training movements of two “athletes”.

188 **Movie S6:** The blooming and closing of bionic flower.

189 **Movie S7:** The operational procedure for the underwater gripper.

190
